# Supplementary material
Source: Springer Nature journal article supplement (https://www.springermedizin.de/resource/supplementary/13584_2013_79_MOESM3_ESM.pdf/9676936)

## First in Life admissions

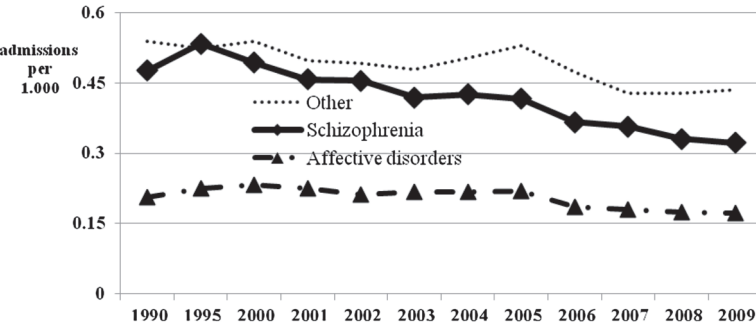

## All Admissions

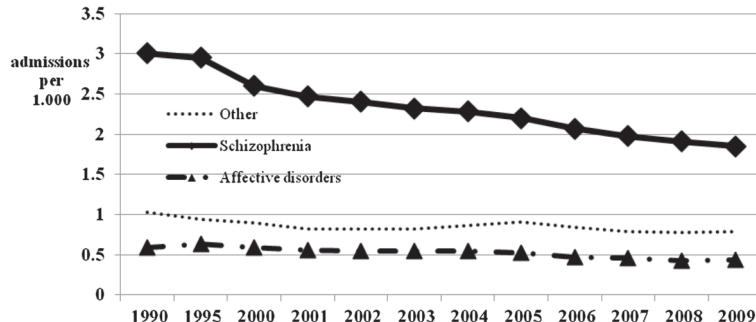

Supplement: MOESM3 [file 9676936]
